# Supplementary material for: Combined chondroitin sulfate and glucosamine for painful knee osteoarthritis: a multicentre, randomised, double-blind, non-inferiority trial versus celecoxib
Source: PubMed Central journal article supplement — Ann Rheum Dis. 2015 Jan 14;75(1):37–44. doi: 10.1136/annrheumdis-2014-206792 (PMC4717399; doi:10.1136/annrheumdis-2014-206792), 2015-01-14
Supplement: annrheumdis-2014-206792-s1.pdf [file annrheumdis-2014-206792-s1.pdf]

**Online Supplementary Table S1**      MOVES Investigation Group

MOVES Trial Investigators

France

Dr Loic Boucher – Private consultant (Murs Erigne, France)

Dr Alain Boye – Private consultant (Nantes, France)

Dr Alain Campagne – Private consultant (Tours, France)

Dr Dominique Delsart – Private consultant (Bersee, France)

Dr Dominique Lejay – Private consultant (Vieux Conde, France)

Dr Philippe Remaud – Private consultant (Angers, France)

Dr Pascal Richette – Hôpital Lariboisière (Paris, France)

Dr Yves-Marie Rivoallan – Private consultant (Falaise, France)

Dr Patrick Robert – Private consultant (Laval, France)

Dr Dominique Saillard – Private consultant (Tours, France)

Germany

Dr Christoph Becher - Med. Hochschule Orthopädische Klinik li Im Annastift (Hannover, Germany)

Dr Christel Contzen - Synexus (Leipzig, Germany)

Dr Elizaveta Degtyareva - Synexus (Leipzig, Germany)

Dr Martin Fuerst – Medbaltic (Kiel, Germany)

Dr Irina Lohrbaecher – Synexus (Leipzig, Germany)

Dr Jasper Neidel - Orthopädie Zentrum (Hamburg, Germany)

Dr Gregory Stein - Klinikum Der Universität Zu Köln (Köln, Germany)

Dr Timo Zippelius - Charité - Universitätsmedizin Berlin (Berlin, Germany)

Poland

Dr Jan Brzezicki – Centrum Kliniczno-Badawcze (Elblag, Poland)

Prof Marek Brzosko - NzoZ Biogenes Sp Z O O (Wroclaw, Poland)

Dr Sławomir Jeka - Reumed Sp Z O O (Lublin, Poland)

Dr Marcin Mazurek - Ars Rheumatica Sp Z O O (Warsaw, Poland)

Dr Artur Racewicz - Osteo-Medic SC (Bialystok, Poland)

Dr Anna Sawiec – Malopolskie Centrum Medyczne (Krakow, Poland)

Prof Piotr Wiland - Reumatika Centrum Reumatologii (Warsaw, Poland)

Dr Anna Zubrzycka - Centrum Medyczne Nowe Miasto (Białystok, Poland)

#### Spain

Dr José Luis Ballvé - CAP Florida (L'Hospitalet de Llobregat, Spain)

Dr Miguel Belmonte - Hospital General de Castellón (Castellón, Spain)

Dr Francisco Blanco - Complejo Hospitalario Universitario A Coruña (A Coruña, Spain)

Dr Miguel Ángel Caracuel - Hospital Universitario Reina Sofía (Córdoba, Spain)

Dr José Gálvez - Hospital General Universitario Morales Messeguer de Murcia (Murcia, Spain)

Dr Alicia García - Hospital Universitario Virgen del Rocío (Sevilla, Spain)

Dr Montserrat López - CAP Mossèn Cinto Verdaguer (L'Hospitalet de Llobregat, Spain)

Dr Emilio Martín - Hospital Universitario La Paz (Madrid, Spain)

Dr Ingrid Möller - Instituto Poal de Reumatología (Barcelona, Spain)

Dr Jordi Monfort - Hospital del Mar (Barcelona, Spain)

Dr Santiago Muñoz - Hospital Infanta Sofía (Madrid, Spain)

Dr Federico Navarro - Hospital Universitario Virgen Macarena (Sevilla, Spain)

Dr Cristóbal Orellana - Corporació Sanitària del Parc Taulí (Sabadell, Spain)

Dr Arturo Rodríguez de la Serna - Hospital de la Santa Creu i Sant Pau (Barcelona, Spain)

Dr Eduardo Úcar - Hospital de Basurto (Bilbao, Spain)

Prof Javier Vaquero - Hospital General Universitario Gregorio Marañón (Madrid, Spain)

#### Statisticians

Ferran Torres, MD, PhD, Biostatistics and Data Management Platform, IDIBAPS; Asociación Hipótesis Alternativa (H1); Biostatistics Unit, Faculty of Medicine, Universitat Autònoma de Barcelona, Barcelona, Spain

José Ríos, MSc, Biostatistics and Data Management Platform, IDIBAPS; Asociación Hipótesis Alternativa (H1); Biostatistics Unit, Faculty of Medicine, Universitat Autònoma de Barcelona, Barcelona, Spain

#### Sponsor Clinical R&D Group

Dr Josep Vergés, MD, MSc, PhD, Clinical R&D Area, Bioiberica SA

Marta Herrero, MSc, Clinical R&D Area, Bioiberica SA

Laura Sánchez, MSc, Clinical R&D Area, Bioiberica SA

Edgar Viles, MSc, Clinical R&D Area, Bioiberica SA

Rocío Espinosa, BSc, Trial Form Support

---

**Online Supplementary Table S2****Inclusion and exclusion criteria****Inclusion criteria**

Age  $\geq 40$  years

Diagnosis of primary osteoarthritis (American College of Rheumatology criteria<sup>1</sup>)

Radiological stages II or III osteoarthritis (Kellgren and Lawrence criteria<sup>2</sup>)

Pain in the knee on most days in the month before entering the trial

Moderate-to-severe pain (WOMAC pain score<sup>3,4</sup>  $>301$ ) at the inclusion visit

No clinical or significant laboratory abnormalities (in the judgment of the investigator)

Negative pregnancy test at screening and use of an acceptable method of birth control for the duration of the study in women of child-bearing potential

Not participating in another clinical trial

Agree to attend all study-related visits. Patients provided written informed consent to participate in the study before initiating any study-related activities.

Provide written informed consent to participate in the study before initiating any study-related activities.

**Subject exclusion criteria**

Known allergy to chondroitin sulphate or glucosamine hydrochloride, hypersensitivity to celecoxib, who have demonstrated allergic-type reactions to sulphonamides, experienced asthma, urticarial, or any allergic-type reaction after taking sulphonamides, aspirin, lactose, or non-steroidal anti-inflammatory drugs (NSAIDs)

Allergy to shellfish

History of intolerance to acetaminophen

Active malignancy or history of a malignancy within the past 5 years

Any history of illness that, in the opinion of the investigator, might confound the results of the study or pose additional risk to the patient

Concurrent arthritic disease (antecedents and/or current signs) that could confound or interfere with the evaluation of pain efficacy (e.g. chondrocalcinosis, Paget's disease of the ipsilateral limb to the target knee, rheumatoid arthritis, aseptic osteonecrosis, gout, septic arthritis, ochronosis, acromegaly, haemochromatosis, Wilson's disease, osteochondromatosis seronegative spondyloarthropathy, mixed connective tissue disease, collagen vascular disease, psoriasis, inflammatory bowel disease)

Pain in other parts of the body greater than the knee pain that could interfere with the evaluation of the index

joint

Patients with fibromyalgia

History of arthroscopy in the affected joint within 6 months prior to study entry

Subjects who have undergone total knee replacement in the contralateral knee within 6 months prior to the Screening Visit and throughout the study

Subjects who plan surgery during the trial

Subjects with a history of heart attack or stroke, or who have experienced chest pain related to heart disease, or who have had serious diseases of the heart such as congestive heart failure (functional classes II–IV of the New York Heart Association)

Patients with high risk of cardiovascular events, according to the American Heart Association assessment of cardiovascular risk tables

Subjects with any significant diseases or conditions, including emotional or psychiatric disorders or substance abuse that, in the opinion of the investigator, are likely to alter the course of osteoarthritis, or the subject's ability to complete the study

Subjects with poorly controlled diabetes mellitus, defined as haemoglobin A<sub>1c</sub> level >8%

Subjects with poorly controlled hypertension (sustained systolic blood pressure of >150 mm Hg or diastolic blood pressure >95 mm Hg)

Subjects with any active acute or chronic infections requiring antimicrobial therapy, or serious viral (e.g. hepatitis, herpes zoster, HIV positivity) or fungal infections

Subjects with a history of recurrent upper gastrointestinal ulceration or active inflammatory bowel disease (e.g. Crohn's disease or ulcerative colitis), a significant coagulation defect, or any other condition, which in the investigator's opinion might preclude the chronic use of celecoxib

Subjects who have been diagnosed as having or have been treated for oesophageal, gastric, pyloric channel, or duodenal ulceration within 30 days prior to receiving the first dose of study medication

Subjects with chronic liver or kidney disease, as defined by alanine transaminase or aspartate aminotransferase >1.0 two times the upper limit of normal) or blood urea nitrogen or serum creatinine > two times the upper limit of normal, at the screening visit

Subjects who have a history of alcohol or substance abuse within 3 years

Subjects receiving any investigational drug within 30 days or 5 half lives (whichever is greater) prior to the inclusion visit

Female subjects who are breastfeeding

#### Treatment-related exclusion criteria

Subjects using corticosteroids (oral, injectable), therapeutic dose of glucosamine, chondroitin sulphate, or diacerein during the 12 weeks preceding inclusion

Subjects using hyaluronic acid (intra-articular target knee) during the 26 weeks preceding inclusion

Subjects using natural health products, homeopathy, and creams or analgesic gels during the week preceding inclusion

Subjects subjected to radioactive synovectomy (target knee)

Subjects receiving analgesics including opioids such as tramadol and codeine, or NSAIDs during the week preceding inclusion. Aspirin (up to 325 mg/day) for cardiovascular reasons could be continued

Subjects who require acetaminophen at daily doses >3000 mg (3 g) most of the days of the month prior to inclusion

Subjects who are taking lithium carbonate, phenytoin or anticoagulants (e.g. warfarin) (with the exception of aspirin up to a maximum daily dose of 325 mg)

Subjects who use oral or topical COX-2 inhibitors during the week preceding inclusion

#### REFERENCES

- 1 Altman R, Asch E, Bloch D, *et al.* Development of criteria for the classification and reporting of osteoarthritis. Classification of osteoarthritis of the knee. Diagnostic and Therapeutic Criteria Committee of the American Rheumatism Association. *Arthritis Rheum* 1986;29:1039-49.
- 2 Kellgren JH, Lawrence JS. Radiological assessment of osteo-arthritis. *Ann Rheum Dis* 1957;16:494-502.
- 3 Bellamy N. Pain assessment in osteoarthritis: experience with the WOMAC osteoarthritis index. *Semin Arthritis Rheum* 1989;18:14-7.
- 4 Bellamy N, Buchanan WW, Goldsmith CH, *et al.* Validation study of WOMAC: a health status instrument for measuring clinically important patient relevant outcomes to antirheumatic drug therapy in patients with osteoarthritis of the hip or knee. *J Rheumatol* 1988;15:1833-40.

**Online Supplementary Table S3.** Assessment of the presence or absence of joint swelling and/or effusion in study knees at each visit

Technique I. Useful for copious effusions and involves placing one hand on top of the patella and the other below it, applying pressure towards the centre of the knee almost as if to send the supposed effusion towards the patellar area. With both index fingers, apply pressure to the central area and observe how the patella lowers and is once again pushed up by the effusion.

Technique II. In less copious effusions than those above, place the fingers of the detector hand on both sides of the patella while the other hand applies pressure inwards. If an effusion is present, you will note that the detector fingers move apart.

Technique III. Useful in mild effusions. It involves sending all the fluid in the medial compartment laterally and subsequently, from there, sending it medially. Note the synovial thickening of this area. For this, the medial compartment can be emptied by moving the palms of your fingers up and down. Immediately afterwards, the same up and down emptying movement is performed with the backs of the fingers, thereby emptying the lateral compartment, whereupon the appearance of medial thickening can be observed.

| Online Supplementary Table S4         |                                                  | Primary efficacy outcome: WOMAC pain score by visit |          |                        |
|---------------------------------------|--------------------------------------------------|-----------------------------------------------------|----------|------------------------|
| Visit (days)                          | Chondroitin sulphate+ glucosamine hydrochloride* | Celecoxib*                                          | p Value† | Treatment differences‡ |
| IUDR: PP population                   |                                                  |                                                     |          |                        |
| Inclusion                             | 372.0 ± 41.8                                     | 370.6 ± 41.4                                        |          |                        |
| 30                                    | 267.7 (255.6; 279.9)                             | 236.4 (224.1; 248.7)                                | <0.001   |                        |
| 60                                    | 231.0 (218.1; 243.8)*                            | 206.0 (193.0; 219.1)*                               | 0.008    | −24.9 (−43.2; −6.6)    |
| 120                                   | 209.9 (196.4; 223.4)*                            | 183.5 (169.7; 197.2)*                               | 0.007    | −26.4 (−45.7; −7.1)    |
| 180                                   | 185.8 (171.2; 200.4)*                            | 184.7 (169.8; 199.6)                                | 0.92     | −1.1 (−22.0; 19.8)     |
| Baseline observation carried forward: |                                                  |                                                     |          |                        |
| PP population                         |                                                  |                                                     |          |                        |
| Inclusion                             | 372.0 ± 41.8                                     | 370.6 ± 41.4                                        |          |                        |
| 30                                    | 267.7 (255.5; 279.8)                             | 236.3 (224.0; 248.6)                                | <0.001   | −31.4 (−48.7; −14.1)   |
| 60                                    | 230.7 (217.9; 243.4)*                            | 205.7 (192.8; 218.6)*                               | 0.007    | −25.0 (−43.1; −6.8)    |
| 120                                   | 208.2 (195.0; 221.4)*                            | 183.6 (170.2; 196.9)*                               | 0.010    | −24.7 (−43.5; −5.9)    |
| 180                                   | 183.1 (169.1; 197.1)*                            | 178.9 (164.7; 193.1)                                | 0.68     | −4.1 (−24.1; 15.8)     |
| Available data only: PP population    |                                                  |                                                     |          |                        |
| Inclusion                             | 372.0 ± 41.8                                     | 370.6 ± 41.4                                        |          |                        |
| 30                                    | 267.5 (255.4; 279.7)                             | 236.1 (223.8; 248.4)                                | <0.001   | −31.4 (−48.7; −14.1)   |
| 60                                    | 229.3 (216.6; 242.0)*                            | 203.0 (190.1; 216.0)*                               | 0.005    | −26.3 (−44.5; −8.2)    |
| 120                                   | 204.3 (191.2; 217.4)*                            | 177.0 (163.6; 190.3)*                               | 0.004    | −27.3 (−46.0; −8.6)    |
| 180                                   | 176.4 (162.4; 190.3)*                            | 171.3 (157.0; 185.6)                                | 0.62     | −5.1 (−25.1; 14.9)     |
| IUDR: ITT population                  |                                                  |                                                     |          |                        |
| Inclusion                             | 372.6 ± 41.8                                     | 371.2 ± 41.5                                        |          |                        |
| 30                                    | 269.3 (257.4; 281.1)                             | 241.2 (229.3; 253.1)                                | 0.001    | −28.1 (−44.9; −11.3)   |
| 60                                    | 236.1 (223.4; 248.8)*                            | 213.0 (200.1; 225.8)*                               | 0.012    | −23.1 (−41.2; −5.1)    |
| 120                                   | 216.9 (203.4; 230.3)*                            | 192.8 (179.2; 206.4)*                               | 0.014    | −24.1 (−43.2; −5.0)    |

|                                       |                       |                       |        |                      |
|---------------------------------------|-----------------------|-----------------------|--------|----------------------|
| 180                                   | 193.2 (178.7; 207.8)* | 196.1 (181.3; 210.9)  | 0.79   | 2.9 (−17.9; 23.6)    |
| Baseline observation carried forward: |                       |                       |        |                      |
| ITT population                        |                       |                       |        |                      |
| Inclusion                             | 372.6 ± 41.8          | 371.2 ± 41.5          |        |                      |
| 30                                    | 270.1 (258.3; 282.0)  | 241.2 (229.3; 253.1)  | <0.001 | −28.9 (−45.7; −12.1) |
| 60                                    | 233.7 (221.3; 246.2)* | 211.5 (199.0; 224.0)* | 0.014  | −22.2 (−39.9; −4.6)  |
| 120                                   | 213.0 (200.0; 225.9)* | 191.5 (178.5; 204.6)* | 0.022  | −21.4 (−39.8; −3.1)  |
| 180                                   | 188.9 (175.1; 202.6)* | 187.9 (174.0; 201.7)  | 0.92   | −1.0 (−20.5; 18.5)   |
| Available data only: ITT population   |                       |                       |        |                      |
| Inclusion                             | 372.6 ± 41.8          | 371.2 ± 41.5          |        |                      |
| 30                                    | 269.0 (257.1; 280.8)  | 240.8 (228.9; 252.7)  | 0.001  | −28.2 (−44.9; −11.4) |
| 60                                    | 230.3 (217.8; 242.7)* | 206.6 (194.0; 219.2)* | 0.009  | −23.7 (−41.4; −6.0)  |
| 120                                   | 205.8 (192.9; 218.7)* | 181.1 (168.1; 194.2)* | 0.008  | −24.7 (−43.0; −6.3)  |
| 180                                   | 177.4 (163.7; 191.2)* | 175.9 (161.8; 189.9)  | 0.88   | −1.6 (−21.3; 18.1)   |

\* Continuous variables are mean±SD at inclusion and baseline and adjusted least square means (95% CIs) for other measurements. Significant differences within-treatment as compared with the previous visit, from the 30-day visit onwards (p<0.001).

†p value of treatment effect.

‡Adjusted mean (95% CI).

ITT, intention to treat; IUDR, imputation using the drop-out reason; PP, per protocol.
